# Table of Contents

## FEATURES

### *Approaches to Biology Teaching and Learning*

**Talking to Learn: Why Biology Students Should Be Talking in Classrooms and How to Make It Happen**  
 Kimberly D. Tanner ..... 89–94

### *From the National Science Foundation*

**Current Developments and Funding Opportunities in Life Sciences Education**  
 Deborah Allen and Terry Woodin ..... 95–99

### *WWW.Life Sciences Education*

**BioDiversifying the Curriculum**  
 Dennis Liu ..... 100–107

### *Current Insights*

**Recent Research in Science Teaching and Learning**  
 Erin Dolan ..... 108–110

### *Meeting Report*

**Northeast Under/graduate Research Organization for Neuroscience (NEURON): Our 13th Conference for Neuroscience Trainees and Educators**  
 Jay P. McLaughlin, Stacey Gomes, Angela Seliga, Sharon Ramos-Goyette, Amy Morrison, Christian G. Reich, and Cheryl A. Frye ..... 111–113

### *Educator Highlight*

**Carol Hurney**  
 Interviewed by Laura L. Mays Hoopes ..... 114–115

### *Book Review*

**The Unbearable Lightness of Being Microscopic**  
 José Vázquez ..... 116–117

## ESSAYS

**Garage Demos: Using Physical Models to Illustrate Dynamic Aspects of Microscopic Biological Processes**  
 Diane K. O’Dowd and Nancy Aguilar-Roca ..... 118–122

**The Research Dynamic: A Professional Development Model for Secondary School Science Teachers**  
 Philip M. Silverman ..... 123–130

## ARTICLES

**A Statistical Analysis of Student Questions in a Cell Biology Laboratory**  
 Elena L. Keeling, Kelly M. Polacek, and Ella L. Ingram ..... 131–139

**A Study of Rubisco through Western Blotting and Tissue Printing Techniques**  
 Zhong Ma, Cynthia Cooper, Hyun-Joo Kim, and Diane Janick-Buckner ..... 140–146

**An Investigative, Cooperative Learning Approach to the General Microbiology Laboratory**  
 Kyle Seifert, Amy Fenster, Judith A. Dilts, and Louise Temple ..... 147–153

### *On the Cover*

(A) Scanned image of a fresh celery petiole in cross-section. (B) Student-prepared tissue prints of cross-sections, immunostained to visualize the distribution of Rubisco (purple). Strongly stained sections are from mature and young petioles of plants grown in bright light, while weakly stained sections (arrows) are from petioles kept in water under dim light for several days before printing, leading to a decrease in Rubisco content. From Ma *et al.* article on p. 140.
